# Supplementary material for: Response of adult dragonflies to artificial prey of different size and colour
Source: PLoS One. 2017 Jun 29;12(6):e0179483. doi: 10.1371/journal.pone.0179483 (PMC5491015; doi:10.1371/journal.pone.0179483)
Supplement: S2 Dataset — (CSV) [file pone.0179483.s004.csv]

date	dragonfly	sex	bead	attack	time
2015-06-19	i	f	5	0	120
2015-06-19	i	f	12	0	120
2015-06-19	i	f	12	0	39
2015-06-19	i	f	12	0	1
2015-07-06	i	f	5	0	64
2015-07-06	i	f	5	0	35
2015-07-06	i	f	5	0	16
2015-07-06	i	f	5	0	120
2015-07-06	i	f	5	0	116
2015-07-06	i	f	12	0	43
2015-07-06	i	f	12	0	62
2015-07-07	i	f	12	0	32
2015-07-07	i	f	12	0	120
2015-07-07	i	f	12	0	86
2015-07-08	i	f	5	0	3
2015-07-08	i	f	12	0	120
2015-07-08	i	f	12	0	86
2015-07-08	i	f	12	0	78
2015-07-08	i	f	12	0	24
2015-07-08	i	f	12	0	52
2015-07-11	i	f	5	0	54
2015-07-11	i	f	5	0	10
2015-07-11	i	f	5	0	15
2015-07-11	i	f	12	0	120
2015-07-11	i	f	12	0	50
2015-07-11	i	f	12	0	33
2015-06-19	i	f	5	1	3
2015-06-19	i	f	5	1	1
2015-06-19	i	f	5	1	3
2015-07-06	i	f	5	1	4
2015-07-06	i	f	5	1	2
2015-07-06	i	f	5	1	5
2015-07-07	i	f	5	1	2
2015-07-07	i	f	5	1	1
2015-07-08	i	f	5	1	4
2015-07-08	i	f	5	1	3
2015-07-08	i	f	5	1	11
2015-07-08	i	f	5	1	2
2015-07-08	i	f	5	1	70
2015-07-08	i	f	12	1	27
2015-07-11	i	f	5	1	2
2015-06-19	i	m	12	0	120
2015-06-19	i	m	12	0	8
2015-07-06	i	m	5	0	104
2015-07-06	i	m	5	0	120
2015-07-06	i	m	5	0	120
2015-07-06	i	m	5	0	21
2015-07-06	i	m	5	0	2
2015-07-06	i	m	5	0	14
2015-07-06	i	m	5	0	65
2015-07-06	i	m	12	0	120
2015-07-06	i	m	12	0	120
2015-07-06	i	m	12	0	15
2015-07-06	i	m	12	0	35
2015-07-06	i	m	12	0	22
2015-07-06	i	m	12	0	120
2015-07-06	i	m	12	0	120
2015-07-06	i	m	12	0	120
2015-07-06	i	m	12	0	120
2015-07-06	i	m	12	0	83
2015-07-07	i	m	12	0	27
2015-07-07	i	m	12	0	120
2015-07-07	i	m	12	0	66
2015-07-07	i	m	12	0	15
2015-07-08	i	m	5	0	19
2015-07-08	i	m	12	0	120
2015-07-08	i	m	12	0	6
2015-07-08	i	m	12	0	120
2015-07-11	i	m	5	0	4
2015-07-11	i	m	5	0	9
2015-07-11	i	m	12	0	120
2015-07-06	i	m	5	1	5
2015-07-07	i	m	5	1	48
2015-07-07	i	m	5	1	5
2015-07-08	i	m	5	1	4
2015-06-19	p	f	12	0	77
2015-07-06	p	f	5	0	66
2015-07-06	p	f	12	0	96
2015-07-06	p	f	12	0	15
2015-07-06	p	f	12	0	120
2015-07-06	p	f	12	0	120
2015-07-07	p	f	12	0	120
2015-07-07	p	f	12	0	90
2015-07-07	p	f	12	0	120
2015-07-08	p	f	5	0	7
2015-07-08	p	f	12	0	28
2015-07-08	p	f	12	0	75
2015-07-08	p	f	12	0	84
2015-07-11	p	f	5	0	120
2015-07-11	p	f	5	0	8
2015-07-11	p	f	12	0	20
2015-06-19	p	f	5	1	2
2015-06-19	p	f	5	1	3
2015-06-19	p	f	5	1	2
2015-06-19	p	f	5	1	1
2015-06-19	p	f	12	1	4
2015-06-19	p	f	12	1	24
2015-06-19	p	f	12	1	9
2015-06-19	p	f	12	1	7
2015-07-06	p	f	5	1	1
2015-07-06	p	f	5	1	53
2015-07-06	p	f	5	1	1
2015-07-06	p	f	12	1	88
2015-07-07	p	f	5	1	1
2015-07-07	p	f	12	1	18
2015-07-07	p	f	12	1	1
2015-07-08	p	f	5	1	3
2015-07-08	p	f	5	1	4
2015-07-08	p	f	12	1	5
2015-07-08	p	f	12	1	22
2015-07-08	p	f	12	1	63
2015-07-11	p	f	5	1	8
2015-07-11	p	f	5	1	3
2015-07-07	p	m	5	0	120
2015-07-07	p	m	12	0	120
2015-07-08	p	m	5	0	4
2015-07-08	p	m	5	0	2
2015-07-08	p	m	12	0	22
2015-07-08	p	m	12	0	53
2015-07-08	p	m	12	0	120
2015-07-11	p	m	5	0	7
2015-07-11	p	m	12	0	120
2015-07-11	p	m	12	0	11
2015-07-06	p	m	5	1	73
2015-07-06	p	m	5	1	7
2015-07-08	p	m	5	1	1
2015-07-08	p	m	5	1	12
2015-07-08	p	m	5	1	2
2015-07-08	p	m	5	1	3
2015-07-11	p	m	5	1	3
2015-07-11	p	m	5	1	4
